# Supplementary material for: On the mechanism behind freezing-induced chemical crosslinking in ice-templated cellulose nanofibril aerogels
Source: Royal Society of Chemistry journal article supplement (doi:10.1039/c8ta06319b), 2018-01-01
Supplement: c8ta06319b1.pdf [file c8ta06319b1.pdf]

## Supporting information

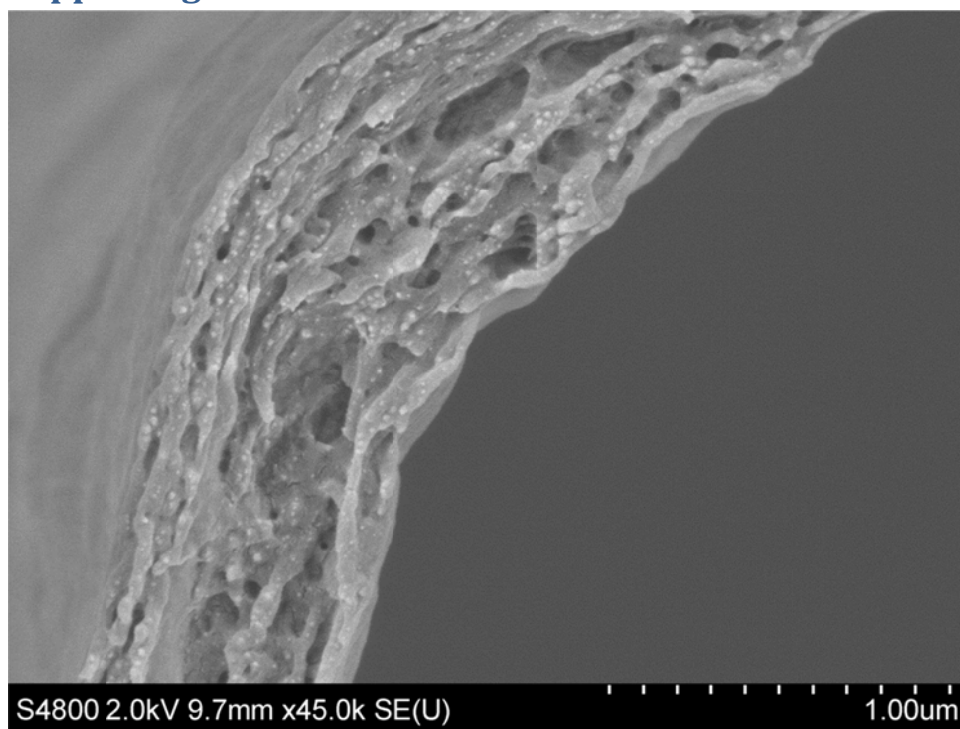

Figure S1. Cross section of a pore wall.

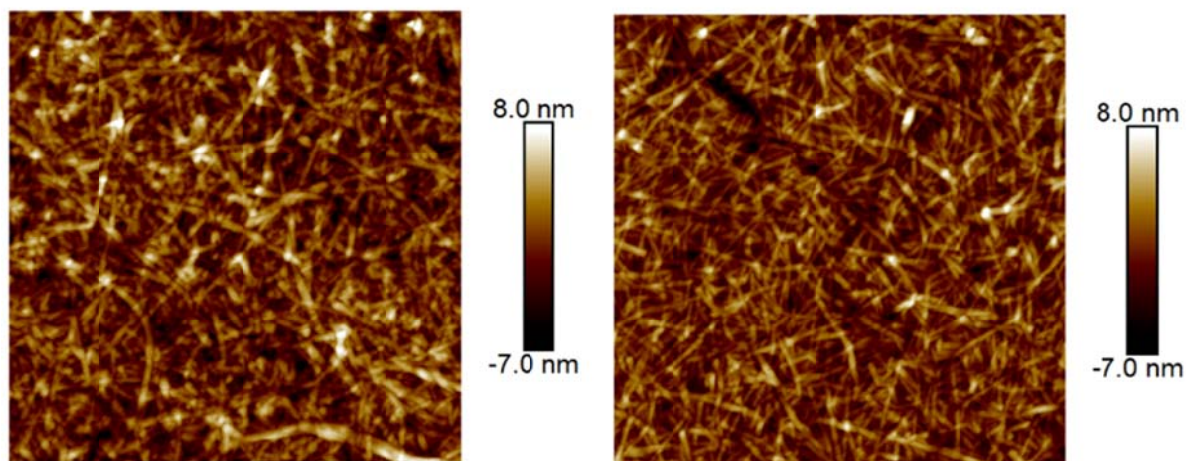

Figure S2. AFM images of adsorbed CNFs Ox30 and non-oxidized.

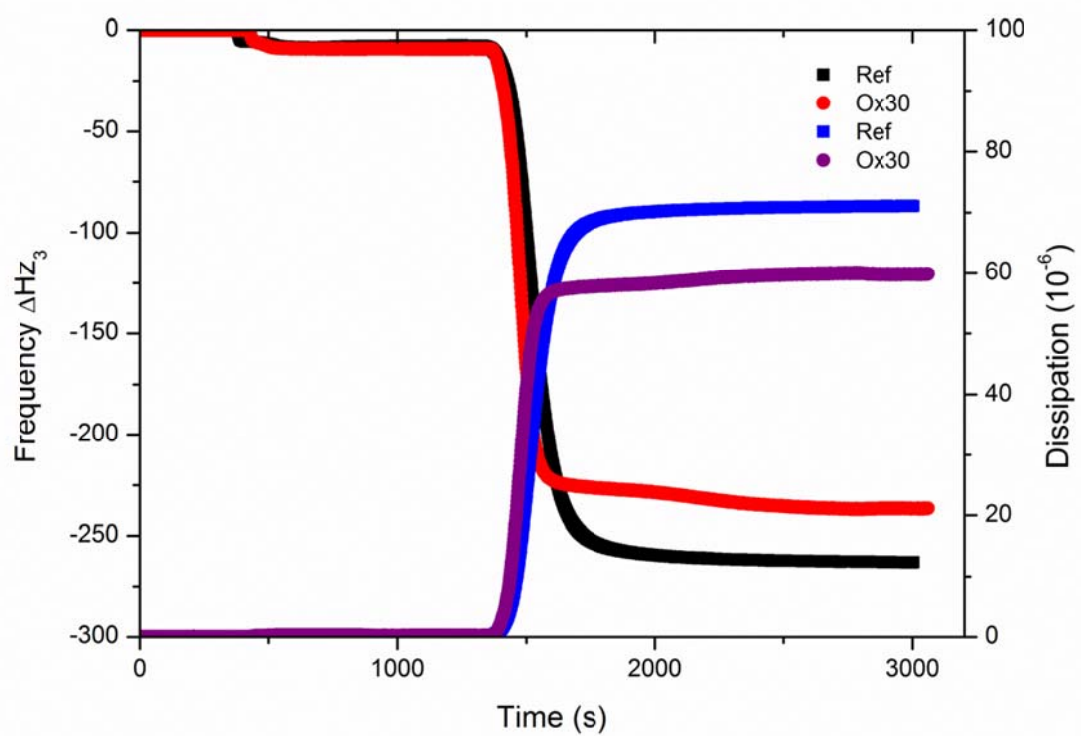

Figure 3. QCM-D data of frequency and dissipation change for the 3<sup>rd</sup> overtone during adsorption of non-oxidized CNFs and Ox30 CNFs.
